# Supplementary material for: Use of an ionic liquid in a two-phase system to improve an alcohol dehydrogenase catalysed reductionElectronic supplementary information (ESI) available: experimental section. See http://www.rsc.org/suppdata/cc/b4/b401065e/
Source: Royal Society of Chemistry journal article supplement (doi:10.1039/b401065e), 2004-01-01
Supplement: b401065e.doc [file b401065e.doc]

Use of an ionic liquid in a two-phase system to improve an alcohol dehydrogenase catalysed reduction

Marrit Eckstein,*a* Murillo Villela Filho*b* , Andreas Liesec and Udo Kragl*a

a Rostock University, Department. of Chemistry, 18051 Rostock, Germany. Fax:+ 49 381 4986452;
 Tel:+ 49 381 4986450; E-mail:udo.kragl@chemie.uni-rostock.de

# Partition coefficients:

# Partition coefficients were determined comparing the ratio of the compound / internal standard area quotient of water and organic solvent.

# Acetone and 2-propanol were measured by GC-FID on a Permabond CW 20-05, 50 m column (Macherey & Nagel) with *tert*-butanol as internal standard. 2-Octanol and 2-octanone were measured by GC-FID on a Agilents / J & W DB-1701, 30 m column with dodecane as internal standard.

**Reaction conditions:**

5mM 2-octanone, 1 M 2-propanol, 0.05 mM NADP+ and alcohol dehydrogenase from *Lactobacillus brevis* in a two-phase system (50 mM phosphate buffer, pH 7.0 and methyl-*tert*-butylether); 30°C, 400 rpm. Samples were taken from the organic phase and analysed by GC-FID with an Agilents / J & W DB-1701 column to calculate the conversion.

The alcohol dehydrogenase from *Lactobacillus brevis* was supplied by Jülich Fine Chemicals (www.juelich-chemicals.com).
